# Supplementary material
Source: Copernicus journal article supplement (doi:10.5194/bg-23-2747-2026)
Supplement: Supplementary file 1 [file bg-23-2747-2026-supplement.pdf]

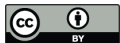

*Supplement of*

## **Technical note: Development of an extraction protocol and colorimetric analysis for alginate in marine sediment**

**Sota Nakazato et al.**

*Correspondence to:* Sota Nakazato (nakazato.sota44@gmail.com)

The copyright of individual parts of the supplement might differ from the article licence.

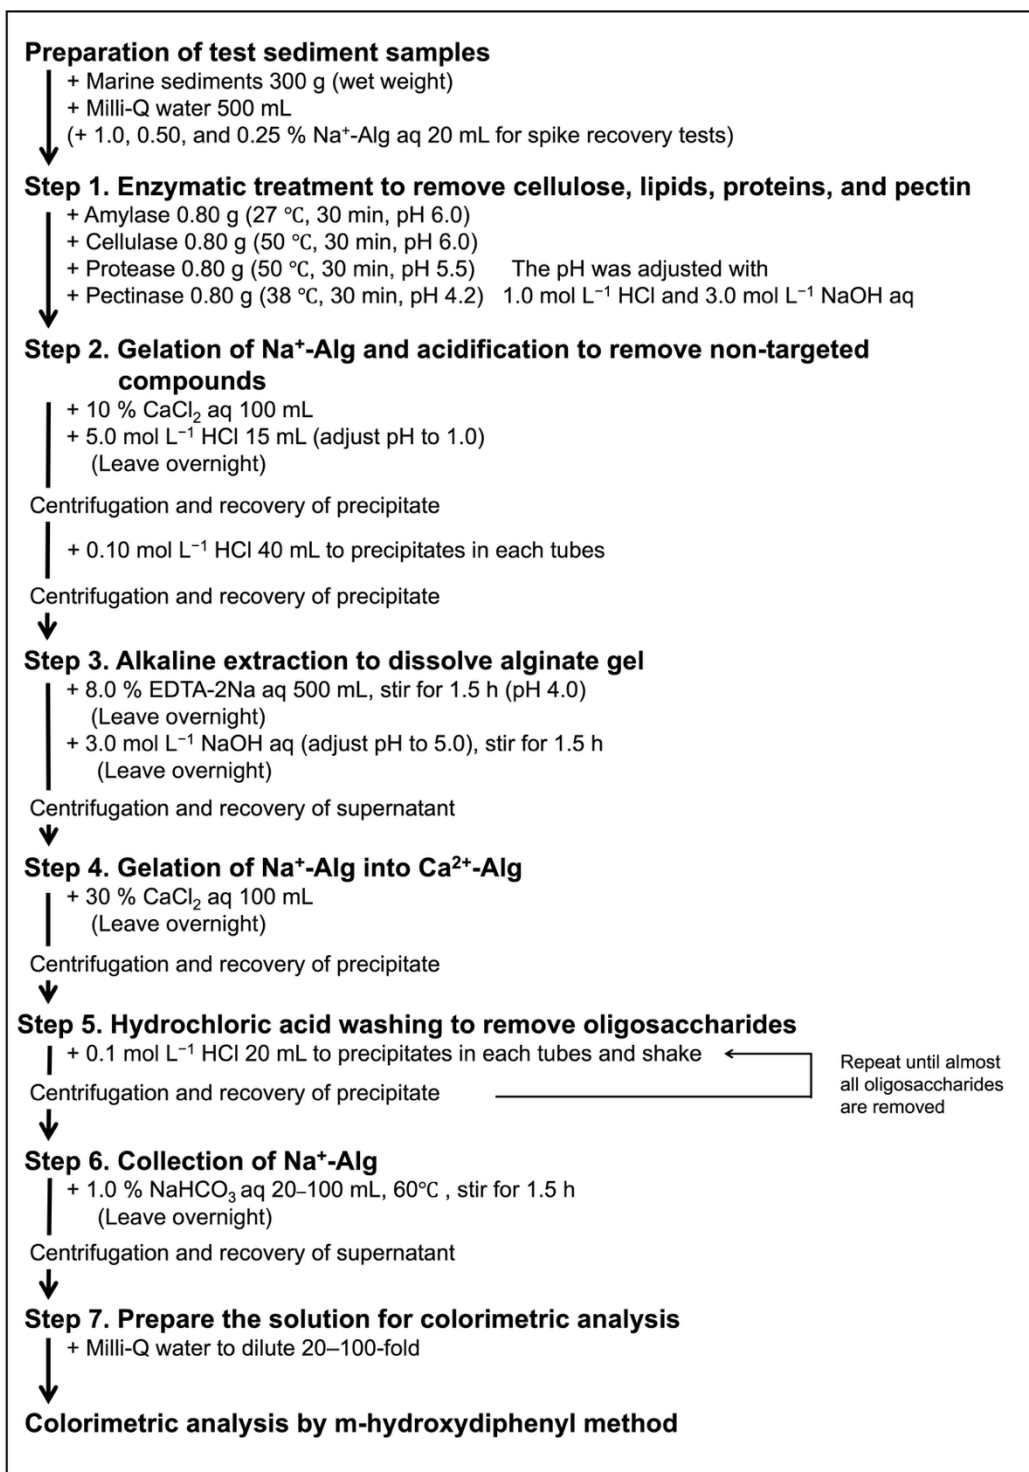

Figure S1: A complete overview of the modified extraction protocol.
